# Supplementary material
Source: publisher figshare collection journal article supplement (https://gsapubs.figshare.com/ndownloader/files/35999729)
Supplement: Supplementary file 1 [file 35999729]

## Sheet: Sheet1
Table S3. Whole-rock geochemistry data for the 21 samples from ther Wuchuan ultramafic-mafic complex and Paleoproterozoic intrusions
Sample Number	19WC01(c)-1	19WC01(c)-2	19WC01(c)-3	19WC02(a)-1	19WC02(a)-2	19WC02(b)-1	19WC02(b)-2	19WC03(a)-1	19WC03(a)-2	19WC03(b)-1	19WC03(b)-2
Rock Type	hornblende pyroxenite	hornblende pyroxenite	hornblende pyroxenite	serpentinized dunite	serpentinized dunite	phlogopite lamprophyre	phlogopite lamprophyre	pyroxenite	pyroxenite	pyroxenite	pyroxenite
Major element (wt.%)
SiO2	40.98	51.96	51.21	36.29	36.49	36.33	35.77	50.54	43.68	48.9	49.18
TiO2	0.06	0.17	0.14	0.02	0.02	0.02	0.02	0.15	0.12	0.37	0.36
Al2O3	0.83	2.63	2.99	0.38	0.33	0.34	0.33	1.58	1.55	5.5	5.05
Fe2O3T	9.84	7.09	7.16	13.49	13.18	13.06	13.36	9.4	12.06	11.64	11.73
FeOT	8.94545	6.44545	6.50909	12.2636	11.9818	11.8727	12.1455	8.54545	10.9636	10.5818	10.6636
MnO	0.09	0.15	0.12	0.07	0.09	0.12	0.14	0.19	0.16	0.18	0.2
MgO	32.46	17.39	20.96	36.4	36.84	35.71	35.2	20.22	24.64	18.54	19.01
CaO	6.2	18.49	14.7	1.05	0.7	0.57	1.16	15.3	10.73	11.12	11.65
Na2O	0.13	0.76	0.6	0.06	0.03	0.02	0.02	0.31	0.21	0.9	0.88
K2O	0.05	0.16	0.19	0.03	0.03	0.03	0.03	0.05	0.05	0.5	0.35
P2O5	0.01	0.02	0.03	0	0.01	0	0	0.01	0.01	0.03	0.03
LOI	9.1	0.43	0.9	11.74	11.6	13.07	13.35	1.15	5.62	1.42	0.51
Trace element (ppm)
Li	5.46	19.4	13.6	1.11	0.84	1.15	1.24	9.67	12.2	16.6	14.8
Be	0.07	0.19	0.24	0.05	0.05	0.05	0.05	0.08	0.1	0.39	0.26
Sc	13.3	50.5	34.1	5.08	5.43	5.12	5	48.4	37.5	44.3	41.6
V	41.5	193	118	35.8	41.1	35.6	36.5	222	151	291	297
Co	100	51.1	62.8	153	162	169	156	76.6	109	83.2	75.6
Ni	874	174	452	1460	1631	1717	1560	358	785	541	429
Cu	7.18	47	194	4.04	4.56	3.41	3.8	217	4.81	35.3	6.06
Zn	58.2	39.1	48.5	81.8	85.3	93.2	87.7	50.1	68.2	90	83
Ga	1.34	3.97	3.8	0.91	0.94	1.06	0.94	2.78	2.33	9.11	7.88
Rb	0.97	1.58	1.79	0.3	0.15	0.15	0.11	1.02	1.2	5.25	2.37
Sr	32.7	132	135	10	6.13	4.42	5.76	49.6	38.6	103	85.7
Y	1.33	6.51	4.63	0.34	0.27	0.23	0.2	5.13	3.08	12.2	9.61
Zr	5.2	10.9	18.2	4	0.6	1.64	0.83	6.18	5.87	24.3	19.7
Nb	0.68	0.53	0.77	0.37	0.23	0.24	0.25	0.27	0.35	2	1.14
Cs	0.07	0.09	0.11	0.05	0.05	0.05	0.05	0.41	0.99	0.54	0.22
Ba	69.3	33.4	24.8	6.54	3.23	9.06	8.84	30.1	21.4	31.6	12.5
La	1.47	3.3	4.5	0.49	0.34	0.46	0.33	1.16	1.17	5.15	3.44
Ce	3.09	8.31	9.51	0.9	0.62	0.99	0.8	3.4	2.93	15	11.3
Pr	0.46	1.39	1.33	0.12	0.08	0.1	0.09	0.59	0.47	2.41	1.88
Nd	2.11	7.66	6.23	0.46	0.31	0.41	0.38	3.32	2.42	11.4	9.68
Sm	0.49	2.05	1.4	0.09	0.05	0.06	0.05	0.86	0.62	2.53	2.18
Eu	0.14	0.61	0.43	0.05	0.05	0.05	0.05	0.24	0.2	0.67	0.59
Gd	0.45	1.95	1.35	0.08	0.05	0.05	0.05	0.96	0.68	2.5	2.21
Tb	0.06	0.25	0.17	0.05	0.05	0.05	0.05	0.15	0.1	0.35	0.31
Dy	0.29	1.38	0.97	0.06	0.05	0.05	0.05	0.93	0.57	2.12	1.97
Ho	0.05	0.26	0.18	0.05	0.05	0.05	0.05	0.19	0.12	0.45	0.38
Er	0.13	0.67	0.45	0.05	0.05	0.05	0.05	0.51	0.31	1.22	1.07
Tm	0.05	0.09	0.06	0.05	0.05	0.05	0.05	0.08	0.05	0.19	0.16
Yb	0.11	0.52	0.37	0.05	0.05	0.05	0.05	0.44	0.26	1.09	0.99
Lu	0.05	0.08	0.06	0.05	0.05	0.05	0.05	0.07	0.05	0.18	0.15
Hf	0.16	0.42	0.44	0.11	0.05	0.06	0.05	0.23	0.21	0.96	0.83
Ta	0.1	0.08	0.08	0.06	0.05	0.05	0.06	0.05	0.05	0.12	0.08
Tl	0.08	0.13	0.05	0.05	0.05	0.05	0.05	0.05	0.05	0.05	0.05
Pb	0.49	1.24	1.17	0.29	0.37	0.26	0.16	0.89	1.01	0.54	0.41
Th	0.34	0.21	0.66	0.09	0.07	0.06	0.07	0.13	0.14	0.07	0.05
U	0.13	0.08	0.18	0.72	1.08	0.3	0.67	0.58	1.63	0.05	0.05
Sample Number	19WC08-1	19WC08-2	19WC11-1	19WC11-2	19WC11-3	19WC12(a)-1	19WC12(a)-2	19WC12(a)-3	19WC13-1	19WC13-2
Rock Type	diorite	diorite	plagioclase granite	plagioclase granite	plagioclase granite	gabbro	gabbro	gabbro	biotite granite	biotite granite
Major element (wt.%)
SiO2	50.32	50.66	58.39	65.3	59.62	49.88	52.22	50.47	54.6	55.44
TiO2	0.71	0.69	0.92	0.78	0.83	0.53	0.7	0.49	0.13	0.12
Al2O3	17.7	17.86	20.99	17.66	19.05	16.71	16.94	16.14	22.41	22.96
Fe2O3T	10.17	9.71	9.04	7.06	8.96	8.2	9.77	8.19	5.39	4.67
FeOT	9.24545	8.82727	8.21818	6.41818	8.14545	7.45455	8.88182	7.44545	4.9	4.24545
MnO	0.17	0.16	0.11	0.08	0.09	0.17	0.15	0.16	0.05	0.04
MgO	5.89	5.55	2.71	2.19	2.47	7.65	6	7.44	3.1	2.76
CaO	6.34	7.28	0.63	0.6	0.62	11.19	9.03	12.45	6.97	7.08
Na2O	3.93	3.86	0.75	1.01	0.95	3.03	3.9	3.04	4.4	4.55
K2O	0.91	0.95	2.85	3.86	3.9	0.76	0.61	0.67	1.09	1.16
P2O5	0.14	0.13	0.05	0.06	0.05	0.07	0.13	0.07	0.03	0.03
LOI	3.16	2.48	3.07	2.11	2.92	1.2	0.09	0.6	1.14	1
Trace element (ppm)
Li	28.1	20.8	41.3	26.5	34.3	20.9	18.2	22	16.7	16
Be	1.14	1.05	0.36	0.28	0.46	0.63	1.13	0.72	0.37	0.36
Sc	27.3	22.3	22.4	16.1	17.6	33.4	31.4	32.3	8.66	7.58
V	224	190	159	138	117	182	281	175	118	104
Co	37.1	31.2	17.9	16.2	18.2	48.5	39.9	37.9	11.3	11.3
Ni	41.6	29.3	30.9	37.7	53.1	32.6	18.6	23	28.4	27.8
Cu	26.4	15.3	31.1	47.2	20.5	6.49	15.2	15.3	10.2	9.93
Zn	102	97.5	134	118	149	132	107	97.2	80.7	82.6
Ga	20.6	18.2	35.7	25	25.4	18.6	21.1	18.3	23.9	26.7
Rb	15.6	12.6	95.9	120	133	9.58	2.83	5.12	3.98	4.53
Sr	706	619	115	142	126	524	480	468	555	605
Y	9.55	8.03	44.7	29.1	36.6	12.4	19.2	13.5	2.62	1.8
Zr	36.3	67.8	278	210	263	74	114	83.1	24.7	27.4
Nb	4.3	3.67	19.9	16.4	16.2	4.2	6.57	3.7	0.34	0.27
Cs	1.51	1.16	1.59	1.31	2.2	0.37	0.14	0.3	0.07	0.05
Ba	504	473	913	1196	1084	386	316	268	608	700
La	21.2	19.1	100	80.9	65	13.4	22.6	13.4	34	36
Ce	38.5	34	193	148	107	28.4	50.1	30.7	50.9	56.2
Pr	4.6	4.07	25.7	18	14.9	3.72	6.75	4.12	5.16	5.58
Nd	18.4	16.7	96.1	69.5	56.7	16.1	29.1	18.3	18.3	18.6
Sm	3.17	2.72	15.4	10.3	9.65	3.1	5.19	3.39	2.06	2.11
Eu	1.11	0.97	1.54	1.83	1.77	0.91	1.42	1.01	2.58	2.76
Gd	2.47	2.03	11.4	7.65	8.77	2.84	4.42	3.1	1.13	0.94
Tb	0.33	0.28	1.45	1.02	1.13	0.38	0.63	0.45	0.11	0.1
Dy	1.81	1.56	8.04	5.7	6.73	2.28	3.6	2.61	0.57	0.41
Ho	0.36	0.32	1.67	1.13	1.36	0.46	0.72	0.53	0.11	0.07
Er	0.98	0.88	4.69	3.04	3.96	1.26	1.91	1.47	0.28	0.16
Tm	0.16	0.14	0.72	0.46	0.65	0.18	0.28	0.23	0.05	0.05
Yb	0.99	0.87	4.22	2.69	3.92	1.08	1.68	1.28	0.27	0.16
Lu	0.17	0.15	0.7	0.44	0.67	0.18	0.28	0.21	0.05	0.05
Hf	0.97	1.59	7.36	5.95	7.1	1.84	2.78	2.1	0.73	0.91
Ta	0.21	0.17	0.78	0.73	0.73	0.17	0.28	0.16	0.05	0.05
Tl	0.09	0.08	0.55	0.64	0.73	0.06	0.05	0.05	0.05	0.05
Pb	8.16	7.42	22.3	22.7	21.1	5.6	2.93	4.47	11.9	11.8
Th	0.13	0.17	31.2	20.5	14	0.48	0.25	0.15	0.15	0.14
U	0.06	5.8	2.1	1.55	1.78	0.1	0.16	0.07	0.06	<0.05
